# Supplementary material
Source: publisher figshare collection journal article supplement (https://future-science-group.figshare.com/ndownloader/files/32587583)
Supplement: Supplementary file 1 [file 32587583]

# PEARL study protocol: a real-world study of fremanezumab effectiveness in patients with chronic or episodic migraine

**Authors:** Messoud Ashina, Faisal Mohammad Amin, Pinar Kokturk, Joshua M Cohen, Martijn Konings, Cristina Tassorelli, Leonidas Lyras & Dimos-Dimitrios Mitsikostas

**Citation:** [www.futuremedicine.com/doi/10.2217/PMT-2021-0015](http://www.futuremedicine.com/doi/10.2217/PMT-2021-0015)

**Trial registration no.:** EUPAS35111 (European Network of Centres for Pharmacoepidemiology and Pharmacovigilance)

Fremanezumab, a humanized monoclonal antibody (IgG2Δa) that selectively targets calcitonin gene-related peptide (CGRP), is approved in Europe for migraine prevention in adults with  $\geq 4$  migraine days/month and in the USA for the preventive treatment of migraine in adults.

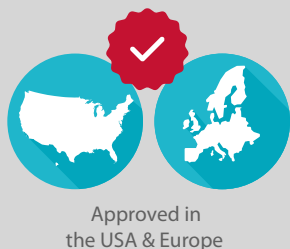

The PEARL study is planned to be conducted in ~100 centers in 11 European countries (Czech Republic, Denmark, Finland, Greece, Italy, Norway, Portugal, Spain, Sweden, Switzerland and the United Kingdom), with an estimated sample size of 1100 patients.

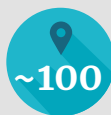

Centers

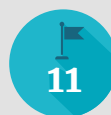

European countries

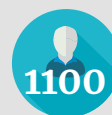

Patients

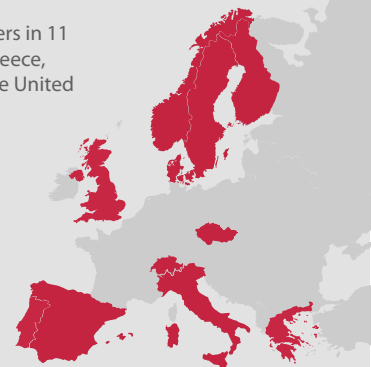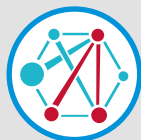

Real-world data

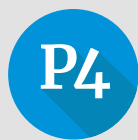

Phase IV

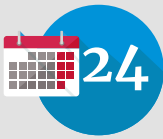

24-month study

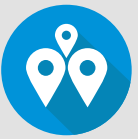

Multicenter

The Pan-European Real Life (PEARL) study is an ongoing, 24-month, multicenter, pan-European, prospective, observational, Phase IV real-world study being conducted in patients with CM or EM.

## KEY ELIGIBILITY CRITERIA

- Male and female patients aged  $\geq 18$  years who have been diagnosed with CM or EM.
- Patients have been prescribed fremanezumab at SC doses of 225 mg monthly or 675 mg quarterly, per the SmPC.
- Patients maintaining a daily headache diary as part of their routine disease management with  $\geq 21$  days of diary data in the 28 days prior to fremanezumab treatment initiation.
- Patients must be willing to record information on their headache duration, severity and characteristics in their diary throughout the study.

## PRIMARY END POINT:

Proportion of patients reaching a clinically meaningful,  $\geq 50\%$  reduction in the monthly number of migraine days during the first 6 months of fremanezumab treatment.

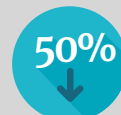

## SECONDARY EFFECTIVENESS END POINTS:

- Changes from baseline in the monthly number of migraine days, in disability severity, and in the monthly number of days of use of acute headache medication with fremanezumab treatment.
- Adherence and persistence with fremanezumab treatment over 24 months, along with reasons for and outcomes of fremanezumab cessation and re-initiation.
- Real-world safety and tolerability during 24 months of treatment with fremanezumab.

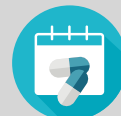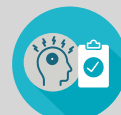

## GLOSSARY:

CM: Chronic migraine; EM: Episodic migraine; SmPC: Summary of product characteristics; SC: Subcutaneous.
